# Supplementary material
Source: PubMed Central journal article supplement (PMC3634879)
Supplement: NIHMS413520-supplement-01.pdf [file NIHMS413520-supplement-01.pdf]

P-values for water and vitreous flow rates across CPM by duty cycle and aspiration.

| <b>Aspiration<br/>(mm Hg)</b> | <i>CPM and Water flow rate<br/>ANOVA p-value</i> |              |              | <i>CPM and Vitreous flow rate<br/>ANOVA p-value</i> |              |              |
|-------------------------------|--------------------------------------------------|--------------|--------------|-----------------------------------------------------|--------------|--------------|
|                               | <i>CORE</i>                                      | <i>50-50</i> | <i>SHAVE</i> | <i>CORE</i>                                         | <i>50-50</i> | <i>SHAVE</i> |
| 100                           | <0.001                                           | <0.001       | <0.001       | <0.001                                              | <0.001       | <0.001       |
| 200                           | <0.001                                           | <0.001       | <0.001       | <0.001                                              | <0.001       | <0.001       |
| 300                           | <0.001                                           | <0.001       | <0.001       | <0.001                                              | <0.001       | <0.001       |
| 400                           | <0.001                                           | <0.001       | <0.001       | <0.001                                              | <0.001       | <0.001       |
| 500                           | <0.001                                           | 0.03         | <0.001       | <0.001                                              | <0.001       | <0.001       |
| 600                           | <0.001                                           | 0.02         | <0.001       | <0.001                                              | <0.001       | <0.001       |
